# Supplementary material for: A novel oncogenic BTK isoform is overexpressed in colon cancers and required for RAS-mediated transformation
Source: PubMed Central journal article supplement (PMC4994017; doi:10.1038/onc.2015.504), 2016-01-25
Supplement: onc2015504x2.pdf [file onc2015504x2.pdf]

| Patients from Desio Hospital |     |     |                 |       |         |             |                   |
|------------------------------|-----|-----|-----------------|-------|---------|-------------|-------------------|
|                              | sex | age | diagnosis       | grade | stage   | lymph nodes | metastasis        |
| #1                           | F   | 59  | villous adenoma | 0     | in situ | 0           | 0                 |
| #2                           | M   | 73  | adenoca         | 3     | III     | 3           | 0                 |
| #3                           | M   | 80  | adenoca         | 2     | II      | 0           | 0                 |
| #4                           | M   | 78  | adenoca         | 2     | II      | 1           | 0                 |
| #5                           | M   | 82  | adenoca         | 1     | II      | 0           | 0                 |
| #6                           | M   | 59  | adenoca         | 3     | III     | 0           | liver, peritoneum |
| #7                           | M   | 78  | adenoca         | 2     | II      | 0           | 0                 |
| #8                           | M   | 67  | adenoca         | 2     | III     | 1           | liver             |
| #9                           | M   | 70  | adenoca         | 3     | II      | 0           | 0                 |
| #10                          | F   | 90  | adenoca         | 1     | II      | 0           | 0                 |
| #11                          | M   | 74  | adenoca         | 2     | IV      | 1           | liver             |
| #12                          | F   | 51  | adenoca         | 2     | II      | 1           | 0                 |
| #13                          | M   | 55  | adenoca         | 3     | III     | 1           | 0                 |

| Patients from Trieste cohort |     |     |           |       |       |             |            |
|------------------------------|-----|-----|-----------|-------|-------|-------------|------------|
|                              | sex | age | diagnosis | grade | stage | lymph nodes | metastasis |
| #1                           | M   | 72  | adenoca   | 1     | II    | 0           | 0          |
| #3                           | F   | 59  | adenoca   | 2     | II    | 0           | 0          |
| #5                           | M   | 72  | adenoca   | 2     | II    | 0           | 0          |
| #7                           | M   | 63  | adenoca   | 2     | II    | 0           | 0          |
| #9                           | M   | 64  | adenoca   | 2     | II    | 0           | 0          |
| #11                          | M   | 70  | adenoca   | 1     | II    | 0           | 0          |
| #13                          | F   | 63  | adenoca   | 2     | II    | 0           | 0          |
| #15                          | F   | 69  | adenoca   | 1     | II    | 0           | 0          |
| #17                          | M   | 69  | adenoca   | 2     | II    | 0           | 0          |
| #19                          | M   | 68  | adenoca   | 2     | II    | 0           | 0          |
| #21                          | F   | 56  | adenoca   | 2     | II    | 0           | 0          |
| #23                          | F   | 46  | adenoca   | 2     | II    | 0           | 0          |
| #25                          | F   | 77  | adenoca   | 2     | II    | 0           | 0          |
| #27                          | F   | 59  | adenoca   | 2     | II    | 0           | 0          |
| #29                          | M   | 60  | adenoca   | 2     | II    | 0           | 0          |
| #31                          | F   | 67  | adenoca   | 2     | II    | 0           | 0          |
| #33                          | M   | 61  | adenoca   | 2     | II    | 0           | 0          |
| #35                          | F   | 67  | adenoca   | 2     | II    | 0           | 0          |
| #37                          | M   | 73  | adenoca   | 2     | II    | 0           | 0          |
| #39                          | M   | 81  | adenoca   | 2     | II    | 0           | 0          |
| #41                          | M   | 66  | adenoca   | 2     | II    | 0           | 0          |
| #43                          | M   | 76  | adenoca   | 2     | II    | 0           | 0          |
| #45                          | F   | 76  | adenoca   | 1     | II    | 0           | 0          |
| #47                          | F   | 61  | adenoca   | 2     | II    | 0           | 0          |
| #49                          | F   | 68  | adenoca   | 2     | II    | 0           | 0          |
| #51                          | F   | 72  | adenoca   | 1     | II    | 0           | 0          |
| #53                          | F   | 80  | adenoca   | 2     | II    | 0           | 0          |
| #55                          | M   | 84  | adenoca   | 2     | II    | 0           | 0          |
| #57                          | F   | 71  | adenoca   | 2     | II    | 0           | 0          |
| #59                          | M   | 82  | adenoca   | 2     | II    | 0           | 0          |
| #61                          | M   | 72  | adenoca   | 2     | II    | 0           | 0          |
| #63                          | F   | 59  | adenoca   | 2     | II    | 0           | 0          |
| #65                          | M   | 54  | adenoca   | 2     | II    | 0           | 0          |
| #67                          | F   | 66  | adenoca   | 1     | II    | 0           | 0          |
| #69                          | M   | 59  | adenoca   | 2     | II    | 0           | 0          |
| #71                          | M   | 65  | adenoca   | 2     | II    | 0           | 0          |
| #73                          | M   | 64  | adenoca   | 2     | II    | 0           | 0          |
| #75                          | M   | 69  | adenoca   | 2     | II    | 0           | 0          |
| #77                          | M   | 79  | adenoca   | 2     | II    | 0           | 0          |
| #79                          | M   | 58  | adenoca   | 2     | II    | 0           | 0          |
| #81                          | F   | 56  | adenoca   | 2     | II    | 0           | 0          |
| #83                          | M   | 58  | adenoca   | 2     | II    | 0           | 0          |

**Supplementary Table 1.** Patients characterization. In the table are shown: age, sex, diagnosis, TNM classification and grade.
